# Supplementary material for: Irregular Expression of Cellular Stress Response Markers in the Placenta of Women with Chronic Venous Disease
Source: MDPI journal article supplement (doi:10.3390/antiox11112277), 2022-11-17
Supplement: s1 [file s1]

-Homo sapiens (Human) Gene: KEAP1 (INRF2, KIAA0132, KLHL19) Q14145 KEAP1\_HUMAN

-Homo sapiens (Human) Gene: NFE2L2 (NRF2) Q16236 NF2L2\_HUMAN

-Homo sapiens (Human) EC:2.7.11.26 Gene: GSK3B Q6FI27 Q6FI27\_HUMAN

-Homo sapiens (Human) Gene: CUL3 (KIAA0617) Q13618 CUL3\_HUMAN
